# Supplementary material for: The Effect of Environmental Stressors on Tinnitus: A Prospective Longitudinal Study on the Impact of the COVID-19 Pandemic
Source: PubMed Central journal article supplement (PMC7565885; doi:10.3390/jcm9092756), 2020-08-26

Supplemental Material

**Table 1. Spearman correlation of the THI change with the Items of the social isolation questionnaire.**

| Item Nr | Item                                                                                                                       | Estimate | CI inf   | CI sup   | P-value  | Adjusted p |
|---------|----------------------------------------------------------------------------------------------------------------------------|----------|----------|----------|----------|------------|
| q1      | I have the feeling that I can maintain my social contacts well via internet, telephone and other means of communication.   | 0.066582 | -0.12452 | 0.256154 | 0.485486 | 1          |
| q2      | I have the feeling that I can occupy myself meaningfully.                                                                  | 0.058055 | -0.1301  | 0.243126 | 0.543176 | 1          |
| q3      | I fear for my own life.                                                                                                    | -0.04109 | -0.22645 | 0.147849 | 0.667048 | 1          |
| q4      | I fear for the lives of relatives and/or friends.                                                                          | -0.00464 | -0.19394 | 0.179859 | 0.961285 | 1          |
| q5      | I'm bored.                                                                                                                 | 0.052165 | -0.14893 | 0.252074 | 0.584904 | 1          |
| q6      | I'm concerned about my personal financial situation.                                                                       | 0.049869 | -0.12668 | 0.224698 | 0.601552 | 1          |
| q7      | I have a feeling of sadness.                                                                                               | -0.31544 | -0.45592 | -0.15984 | 0.000705 | 0.036514   |
| q8      | I feel frustrated.                                                                                                         | -0.196   | -0.35974 | -0.02684 | 0.038351 | 0.851705   |
| q9      | I fear infecting other people.                                                                                             | -0.00082 | -0.19285 | 0.191987 | 0.993168 | 1          |
| q10     | I receive a lot of support from other people (e.g. family, friends, neighbours, social institutions ...).                  | 0.058127 | -0.13279 | 0.24503  | 0.542678 | 1          |
| q11     | I feel alone.                                                                                                              | -0.17537 | -0.34243 | -0.00225 | 0.064387 | 1          |
| q12     | I sleep worse.                                                                                                             | -0.18244 | -0.35659 | -0.00531 | 0.054189 | 1          |
| q13     | I have bad dreams.                                                                                                         | -0.14582 | -0.33076 | 0.046177 | 0.12501  | 1          |
| q14     | I feel less stressed than usual.                                                                                           | 0.404665 | 0.243535 | 0.54645  | 9.63E-06 | 0.001497   |
| q15     | I feel helpless.                                                                                                           | -0.2112  | -0.38241 | -0.03246 | 0.025396 | 0.658001   |
| q16     | I am afraid that my supplies (food, water, clothes, toiletries, medicine and whatever else I need to live) are not enough. | 0.002769 | -0.1925  | 0.198037 | 0.97688  | 1          |
| q17     | I feel guilty.                                                                                                             | -0.1498  | -0.33812 | 0.043848 | 0.114919 | 1          |
| q18     | I feel well informed about the current circumstances.                                                                      | 0.120794 | -0.05457 | 0.291949 | 0.204558 | 1          |
| q19     | I'm nervous.                                                                                                               | -0.373   | -0.51935 | -0.20752 | 5.11E-05 | 0.003976   |
| q20     | I feel lethargic.                                                                                                          | -0.15663 | -0.32903 | 0.022067 | 0.099112 | 1          |
| q21     | I have someone to talk to.                                                                                                 | 0.080128 | -0.10342 | 0.261562 | 0.401001 | 1          |
| q22     | I have the feeling that even in quarantine I can keep good contact with my family and friends.                             | 0.074802 | -0.11778 | 0.256652 | 0.433132 | 1          |
| q23     | When I feel worse, I know what I can do or who to turn to.                                                                 | 0.102458 | -0.07696 | 0.277637 | 0.282386 | 1          |
| q24     | I'm happy.                                                                                                                 | 0.143291 | -0.04176 | 0.31877  | 0.131754 | 1          |
| q25     | I'm certain that this situation will come to an end.                                                                       | 0.245603 | 0.063044 | 0.407866 | 0.00905  | 0.281377   |
| q26     | I'm confused.                                                                                                              | -0.28185 | -0.43661 | -0.11501 | 0.002607 | 0.101323   |
| q27     | I currently consume more stimulants than usual (e.g. sweets, alcohol, nicotine, ...)                                       | -0.12985 | -0.31249 | 0.058278 | 0.172388 | 1          |
| q28     | I'm upset by the current situation.                                                                                        | -0.1091  | -0.28948 | 0.075947 | 0.252159 | 1          |
| q29     | The uncertain future unsettles me.                                                                                         | 0.028911 | -0.1548  | 0.214122 | 0.762196 | 1          |
| q30     | I feel stigmatised.                                                                                                        | 0.051513 | -0.12867 | 0.231633 | 0.58961  | 1          |
| q31     | I'm waiting for someone to call me or write to me.                                                                         | 0.011607 | -0.1725  | 0.19568  | 0.903324 | 1          |
| q32     | I feel sufficiently well connected through telephone and internet.                                                         | -0.01684 | -0.2115  | 0.175258 | 0.860113 | 1          |
| q33     | In my domestic isolation I have enough room for myself.                                                                    | -0.01119 | -0.20787 | 0.17767  | 0.906818 | 1          |

|     |                                                                                                                                                     |          |          |          |          |   |
|-----|-----------------------------------------------------------------------------------------------------------------------------------------------------|----------|----------|----------|----------|---|
| q34 | Even in my domestic isolation I have enough social contacts.                                                                                        | 0.059323 | -0.13332 | 0.241143 | 0.534388 | 1 |
| q35 | I use social media (Whatsapp, Facebook, Twitter, Instagram, Reddit, ...) more than usual in the current situation.                                  | -0.14989 | -0.33391 | 0.041557 | 0.114702 | 1 |
| q36 | If I get infected, I am particularly at risk because I belong to a risk group (e.g. because of lung disease, immune deficiency, diabetes, old age). | 0.017645 | -0.17857 | 0.213583 | 0.853499 | 1 |
| q37 | I'm able to perform my usual activities (e.g. work, hobbies) as usual.                                                                              | 0.085886 | -0.10776 | 0.277799 | 0.367907 | 1 |

**Table S2. Spearman correlation of the mini-TQ change with the Items of the social isolation questionnaire**

| Item Nr | Item                                                                                                                       | Estimate | CI inf   | CI sup   | P-value  | Adjusted p |
|---------|----------------------------------------------------------------------------------------------------------------------------|----------|----------|----------|----------|------------|
| q1      | I have the feeling that I can maintain my social contacts well via internet, telephone and other means of communication.   | 0.090322 | -0.10324 | 0.279272 | 0.36185  | 1          |
| q2      | I have the feeling that I can occupy myself meaningfully.                                                                  | 0.132734 | -0.06626 | 0.323454 | 0.1792   | 1          |
| q3      | I fear for my own life.                                                                                                    | 0.015302 | -0.17296 | 0.207201 | 0.877469 | 1          |
| q4      | I fear for the lives of relatives and/or friends.                                                                          | 0.064516 | -0.1301  | 0.253    | 0.515265 | 1          |
| q5      | I'm bored.                                                                                                                 | 0.040309 | -0.15838 | 0.242567 | 0.684548 | 1          |
| q6      | I'm concerned about my personal financial situation.                                                                       | 0.055832 | -0.12114 | 0.229783 | 0.573477 | 1          |
| q7      | I have a feeling of sadness.                                                                                               | -0.33289 | -0.47754 | -0.17646 | 0.000555 | 0.028752   |
| q8      | I feel frustrated.                                                                                                         | -0.34785 | -0.49504 | -0.18768 | 0.000297 | 0.023064   |
| q9      | I fear infecting other people.                                                                                             | 0.022523 | -0.16359 | 0.212338 | 0.82047  | 1          |
| q10     | I receive a lot of support from other people (e.g. family, friends, neighbours, social institutions ...).                  | -0.0407  | -0.2206  | 0.146909 | 0.681647 | 1          |
| q11     | I feel alone.                                                                                                              | -0.14636 | -0.3166  | 0.031268 | 0.138202 | 1          |
| q12     | I sleep worse.                                                                                                             | -0.16715 | -0.34721 | 0.018477 | 0.089896 | 1          |
| q13     | I have bad dreams.                                                                                                         | -0.14563 | -0.3359  | 0.054319 | 0.140183 | 1          |
| q14     | I feel less stressed than usual.                                                                                           | 0.459443 | 0.295885 | 0.598574 | 9.3E-07  | 0.000145   |
| q15     | I feel helpless.                                                                                                           | -0.2061  | -0.37587 | -0.01652 | 0.035813 | 0.795355   |
| q16     | I am afraid that my supplies (food, water, clothes, toiletries, medicine and whatever else I need to live) are not enough. | 0.074155 | -0.13027 | 0.274567 | 0.454385 | 1          |
| q17     | I feel guilty.                                                                                                             | -0.19254 | -0.38065 | 0.004497 | 0.050211 | 0.975714   |
| q18     | I feel well informed about the current circumstances.                                                                      | 0.04734  | -0.14044 | 0.234404 | 0.633214 | 1          |
| q19     | I'm nervous.                                                                                                               | -0.30747 | -0.46366 | -0.13228 | 0.001499 | 0.058247   |
| q20     | I feel lethargic.                                                                                                          | -0.14463 | -0.32111 | 0.041247 | 0.142957 | 1          |
| q21     | I have someone to talk to.                                                                                                 | 0.101478 | -0.1016  | 0.298177 | 0.305357 | 1          |
| q22     | I have the feeling that even in quarantine I can keep good contact with my family and friends.                             | 0.081479 | -0.11843 | 0.279879 | 0.410935 | 1          |
| q23     | When I feel worse, I know what I can do or who to turn to.                                                                 | 0.112346 | -0.06352 | 0.277933 | 0.256182 | 1          |
| q24     | I'm happy.                                                                                                                 | 0.138863 | -0.04491 | 0.317354 | 0.159774 | 1          |
| q25     | I'm certain that this situation will come to an end.                                                                       | 0.234645 | 0.035184 | 0.416601 | 0.016504 | 0.427622   |
| q26     | I'm confused.                                                                                                              | -0.28804 | -0.44171 | -0.11741 | 0.003026 | 0.094084   |
| q27     | I currently consume more stimulants than usual (e.g. sweets, alcohol, nicotine, ...)                                       | -0.06995 | -0.26126 | 0.126702 | 0.480456 | 1          |
| q28     | I'm upset by the current situation.                                                                                        | -0.07983 | -0.26302 | 0.108428 | 0.420505 | 1          |
| q29     | The uncertain future unsettles me.                                                                                         | -0.03473 | -0.21841 | 0.153316 | 0.726367 | 1          |

|     |                                                                                                                                                     |          |          |          |          |   |
|-----|-----------------------------------------------------------------------------------------------------------------------------------------------------|----------|----------|----------|----------|---|
| q30 | I feel stigmatised.                                                                                                                                 | -0.02559 | -0.21581 | 0.166258 | 0.796503 | 1 |
| q31 | I'm waiting for someone to call me or write to me.                                                                                                  | 0.089087 | -0.09648 | 0.268159 | 0.368482 | 1 |
| q32 | I feel sufficiently well connected through telephone and internet.                                                                                  | -0.01906 | -0.21971 | 0.18139  | 0.847671 | 1 |
| q33 | In my domestic isolation I have enough room for myself.                                                                                             | -0.03565 | -0.23252 | 0.165095 | 0.719371 | 1 |
| q34 | Even in my domestic isolation I have enough social contacts.                                                                                        | 0.017655 | -0.18219 | 0.218642 | 0.858817 | 1 |
| q35 | I use social media (Whatsapp, Facebook, Twitter, Instagram, Reddit, ...) more than usual in the current situation.                                  | 0.003181 | -0.19286 | 0.201397 | 0.974434 | 1 |
| q36 | If I get infected, I am particularly at risk because I belong to a risk group (e.g. because of lung disease, immune deficiency, diabetes, old age). | 0.101624 | -0.08604 | 0.28702  | 0.304655 | 1 |
| q37 | I'm able to perform my usual activities (e.g. work, hobbies) as usual.                                                                              | 0.040037 | -0.16482 | 0.238025 | 0.686561 | 1 |

Figure S1. Scatterplot of the THI change with the Big Five Personality Factors

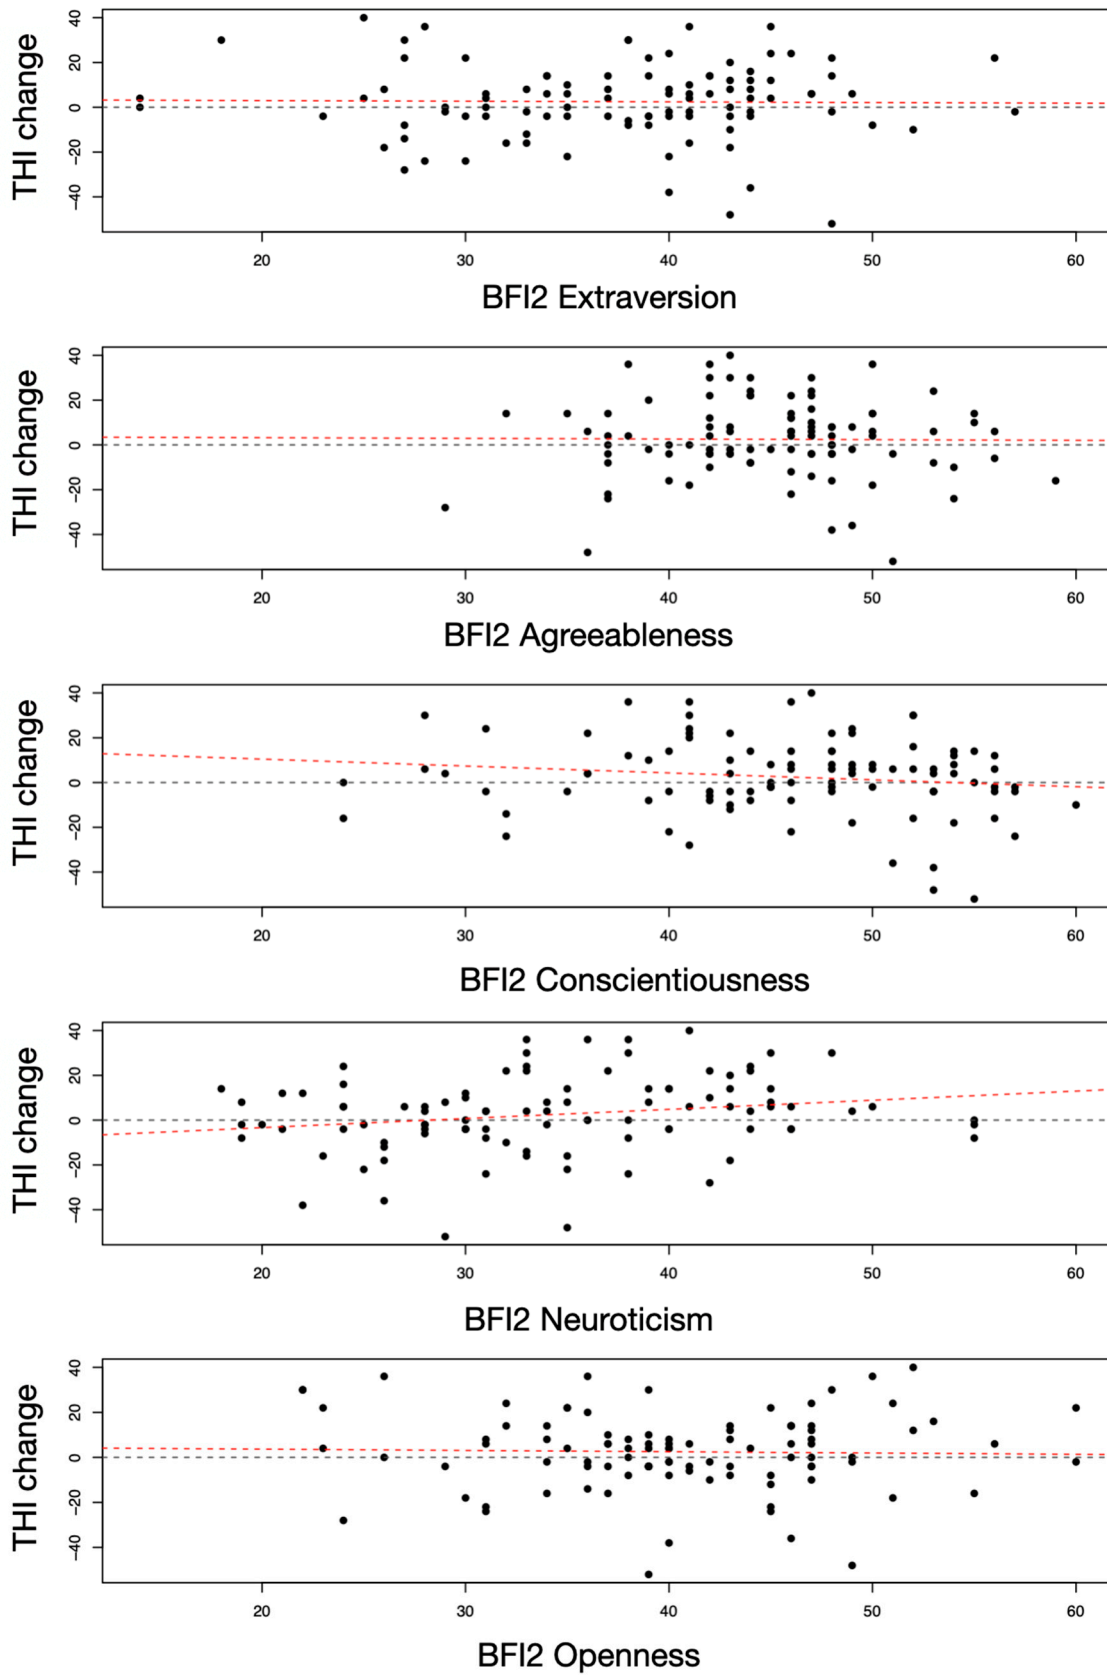

Figure S2. Scatterplot of the mini-TQ change with the Big Five Personality Factors

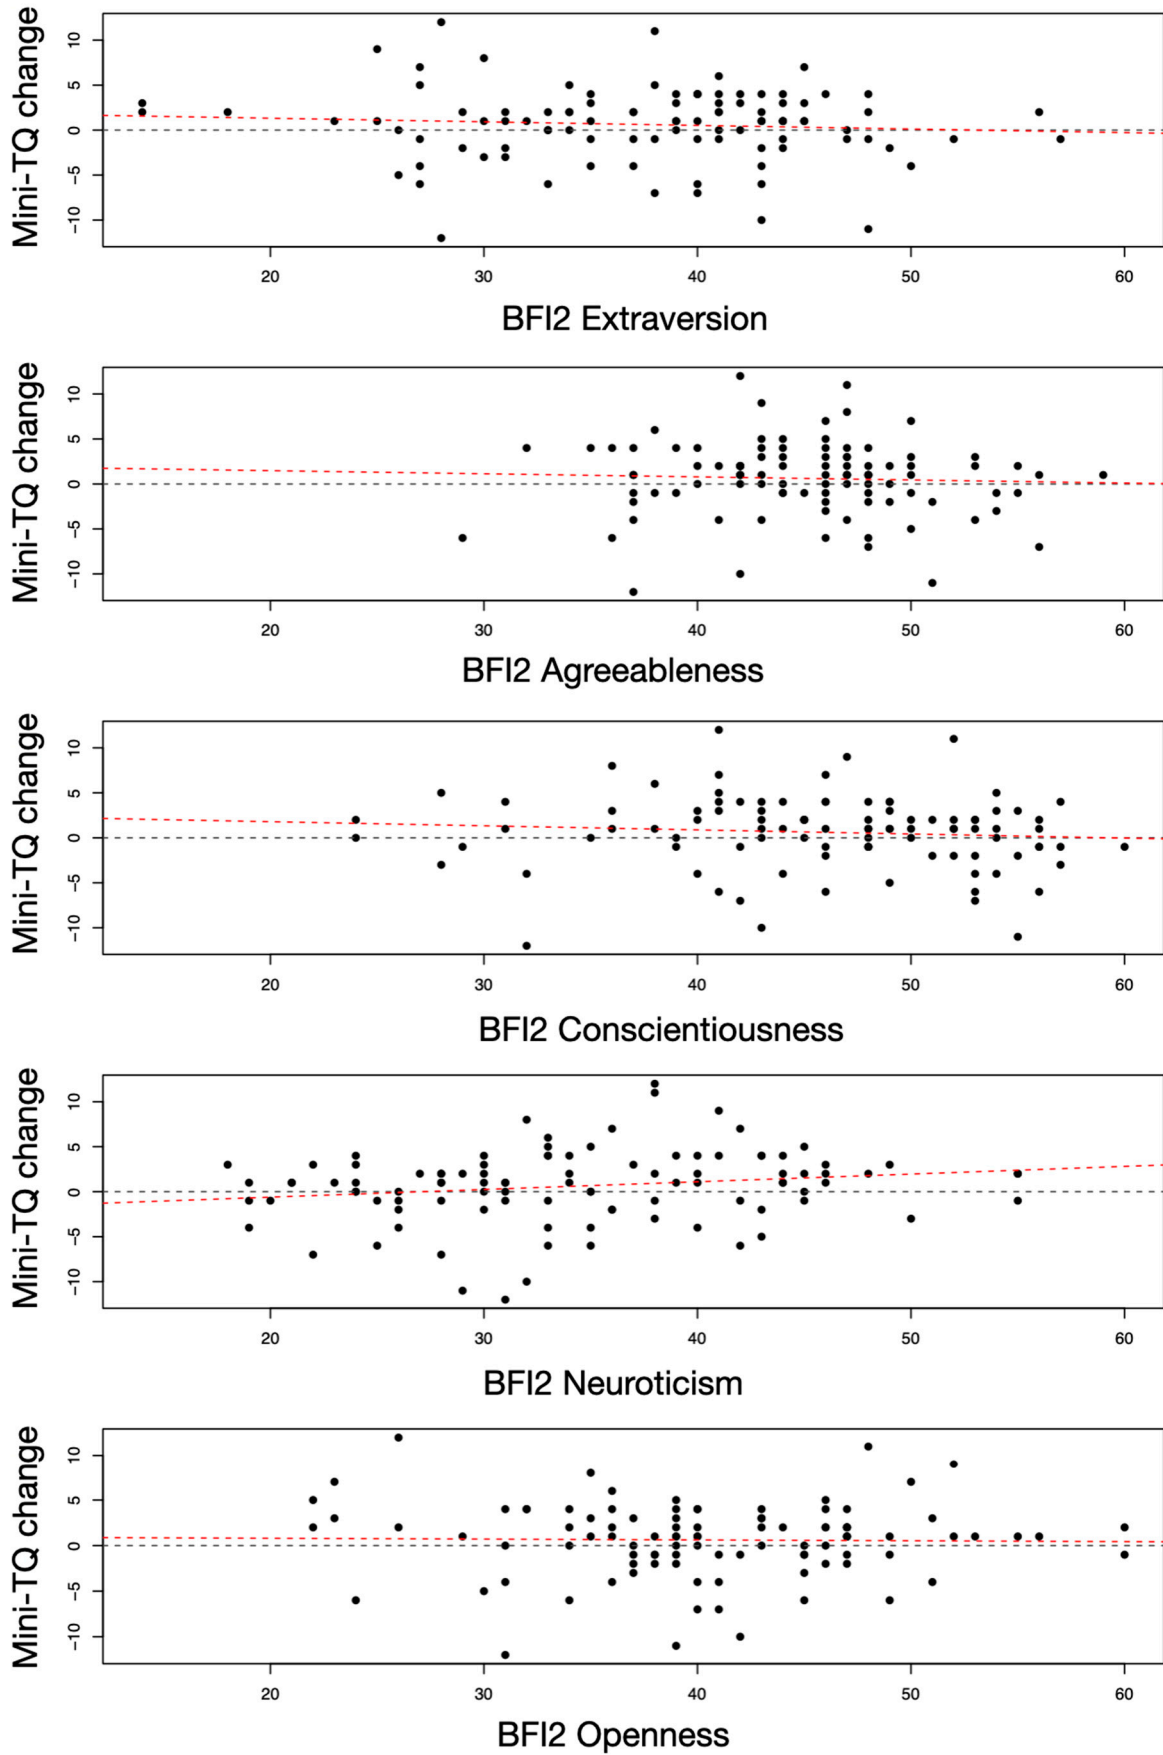

Supplement: jcm-09-02756-s001.pdf [file jcm-09-02756-s001.pdf]
